# Supplementary material for: Pseudochrobactrum albidum sp. nov., a dimethylformamide-degrading bacterium isolated from activated sludge of a wastewater treatment plant
Source: Research Square preprint supplement (doi:10.21203/rs.3.rs-7719886/v1), 2025-11-12

***Pseudochrobactrum albidum sp. nov.,* a dimethylformamide-degrading bacterium isolated from activated sludge of a wastewater treatment plant.**

Qiyun Zheng1,2#, Wenwu Zhang3#, Yue Su3, Yusi Yang3, Xiaoyu Bai3, Hongzhe Hu3, Shasha Qiu1, Xinyi Huang2, Tao Wang4, Can Chen1*

**Affiliation**

1 College of Life Science, Zhejiang University, Hangzhou 310000, PR China

2 College of Animal Science, Zhejiang University, Hangzhou 310000, PR China

3 Trend Biotech Co., Ltd., Hangzhou, 311121, PR China

4 Department of Microbiology, University of Georgia, Athens, GA, USA

**Correspondence:** Can Chen, Email: [chen_can_1990@163.com](mailto:chen_can_1990@163.com)

**Running title:** Taxonomic identification of *Pseudochrobactrum*

**Abbreviations:**

ANI, average nucleotide identity; CAZy, carbohydrate-active enzyme; dDDH, digital DNA-DNA hybridization; Q-10: Ubiquinone-10; KCTC, Korean Collection for Type Cultures; LB, Luria-Bertani broth; MCCC, Marine Culture Collection of China; ML, maximum-likelihood; MP, maximum-parsimony; NJ, neighbour-joining; PC: Phosphatidylcholine; DPG: diphosphatidylglycerol; PG: phosphatidylglycerol; PE: phosphatidylethanolamine; PME: phosphatidylmonomethylethanolamine; PGL: phospho glycolipid; AL: amino lipid; PL: phospholipid; L: lipid; DMF: N,N-dimethylformamide.

**Data availability:**

The GenBank accession number for the 16S rRNA gene sequence of strain HB0163T is PV945978; and the genome sequences of strain HB0163T is JBPVTR000000000.

Fig. S1. Transmission electron microscope of cells of strain HB0163T grown on LB for 3 days at 28 °C.


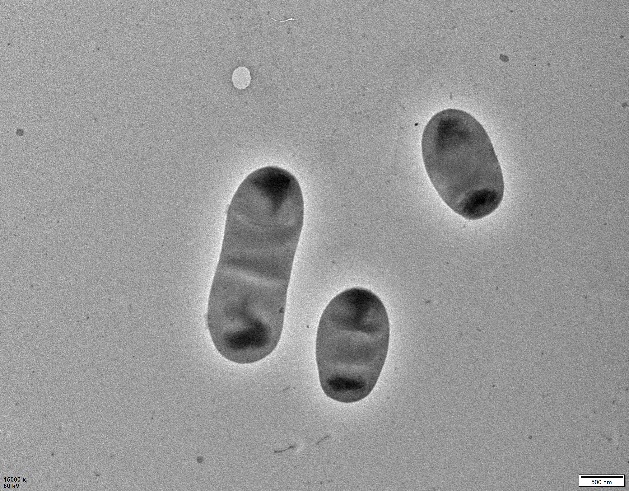

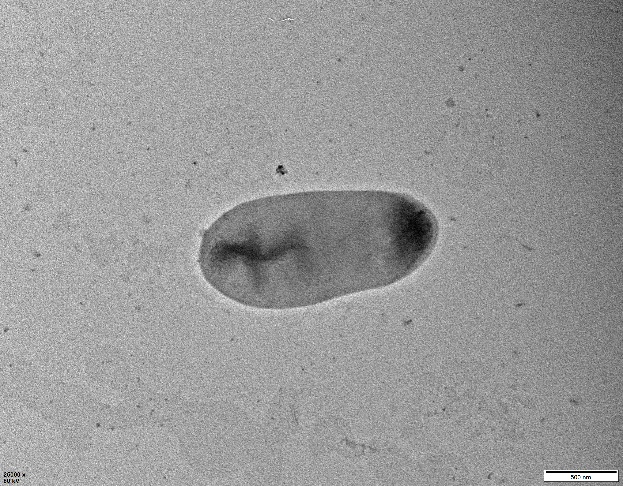


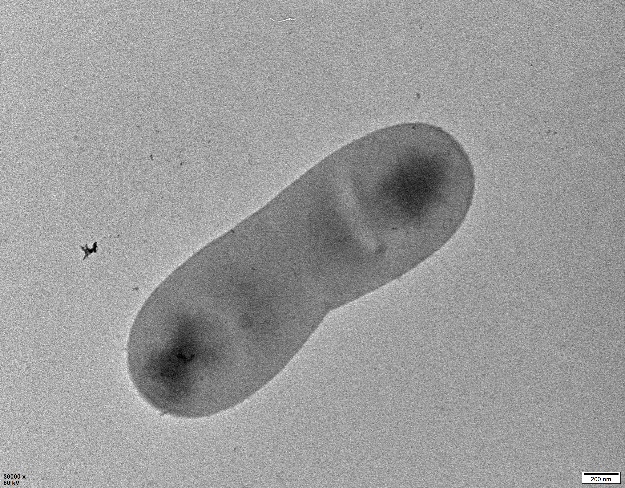

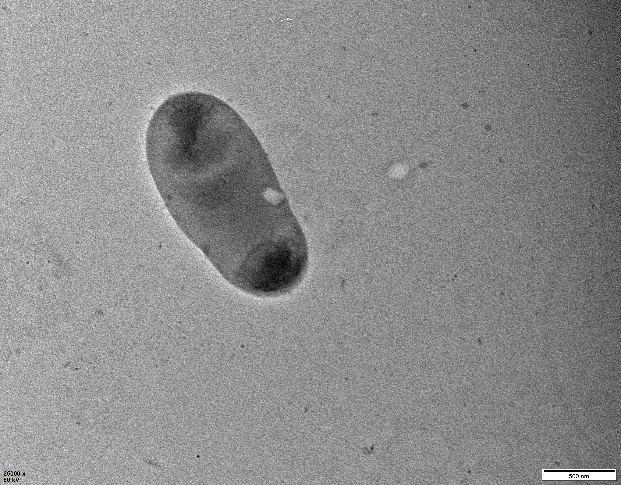


Fig. S2. Two-dimensional TLC plate images of total polar lipids of strain HB0163T with different spraying reagents molybdophosphoric acid(a); ninhydrin reagent(b); molybdenum blue(c); sulfuric acid(d).


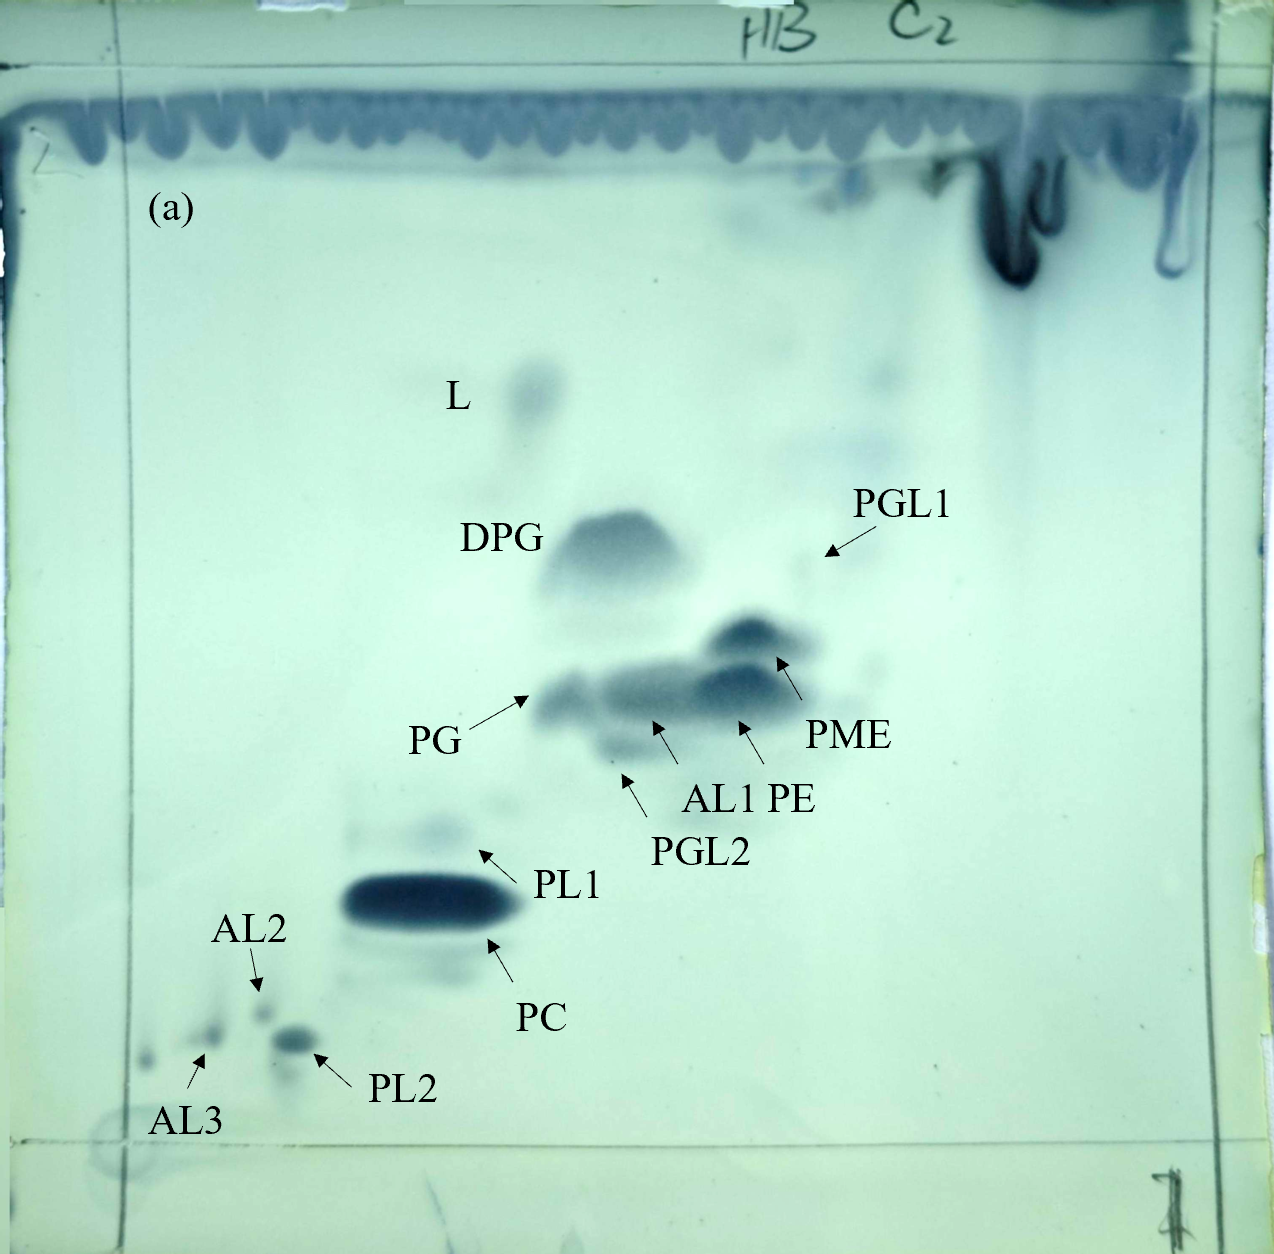

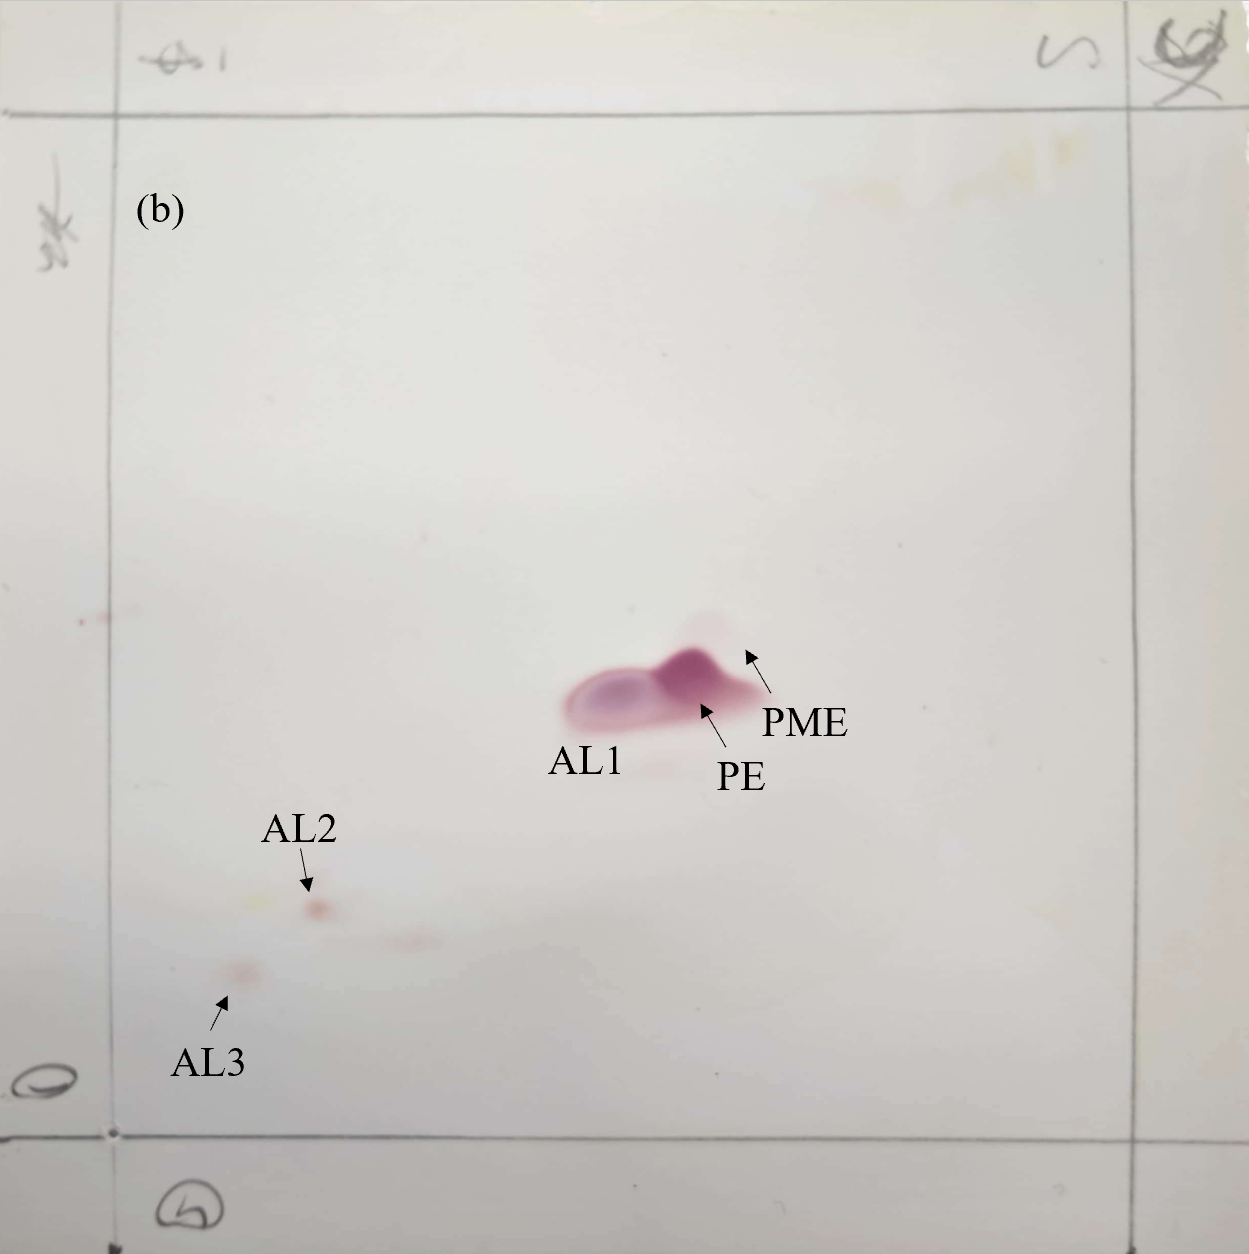


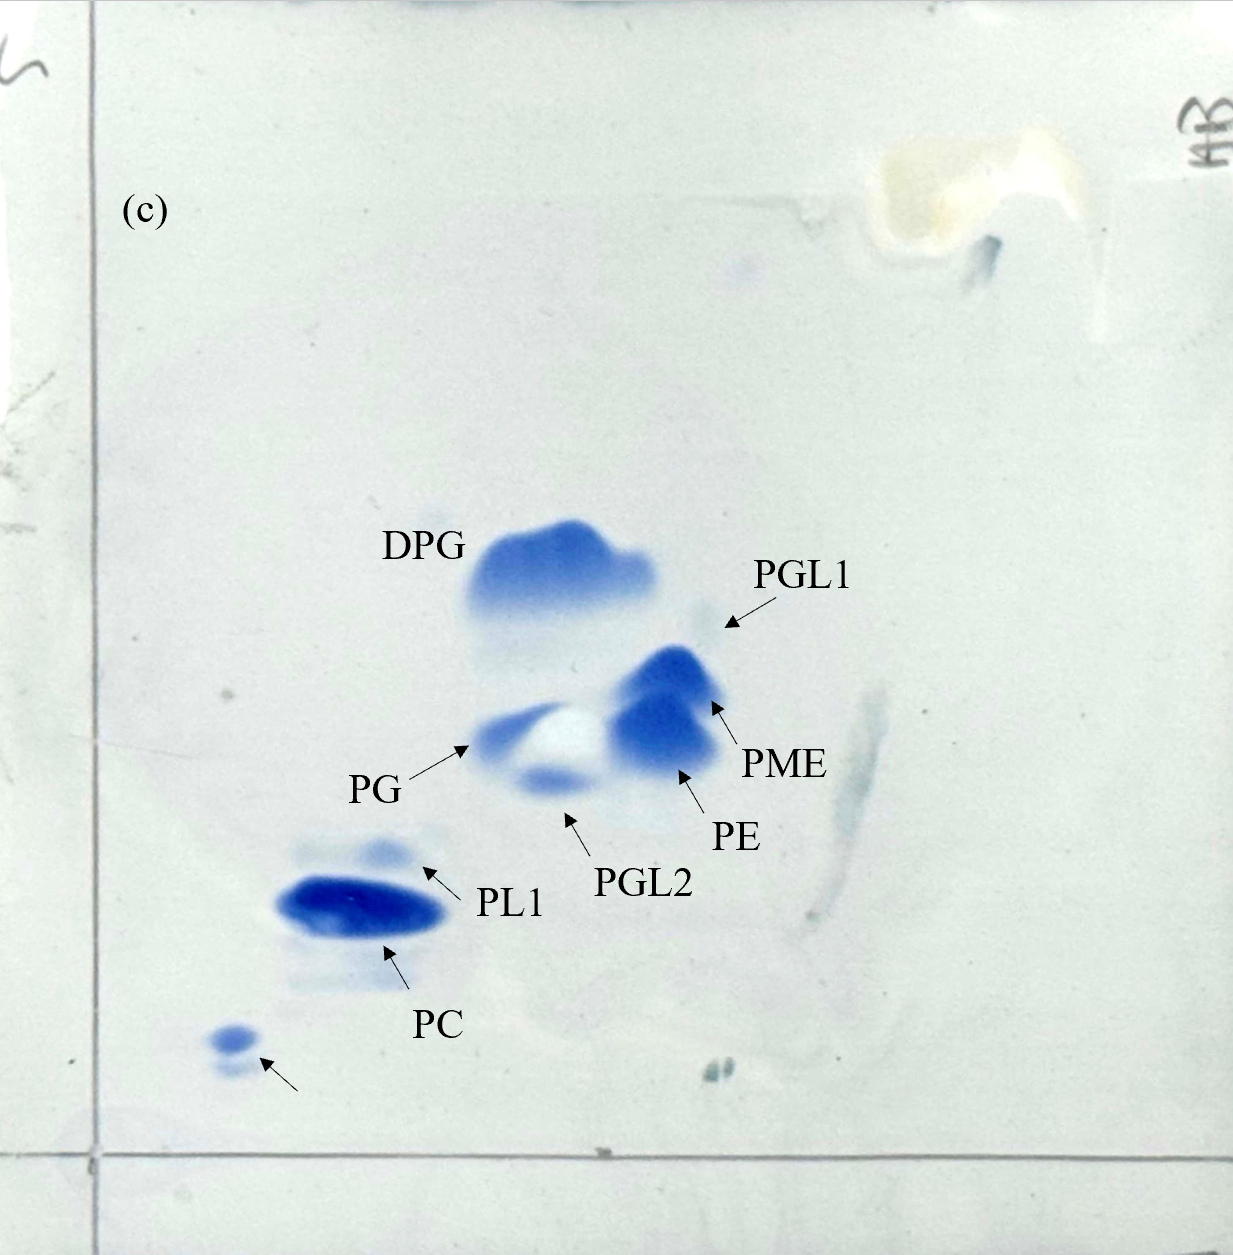

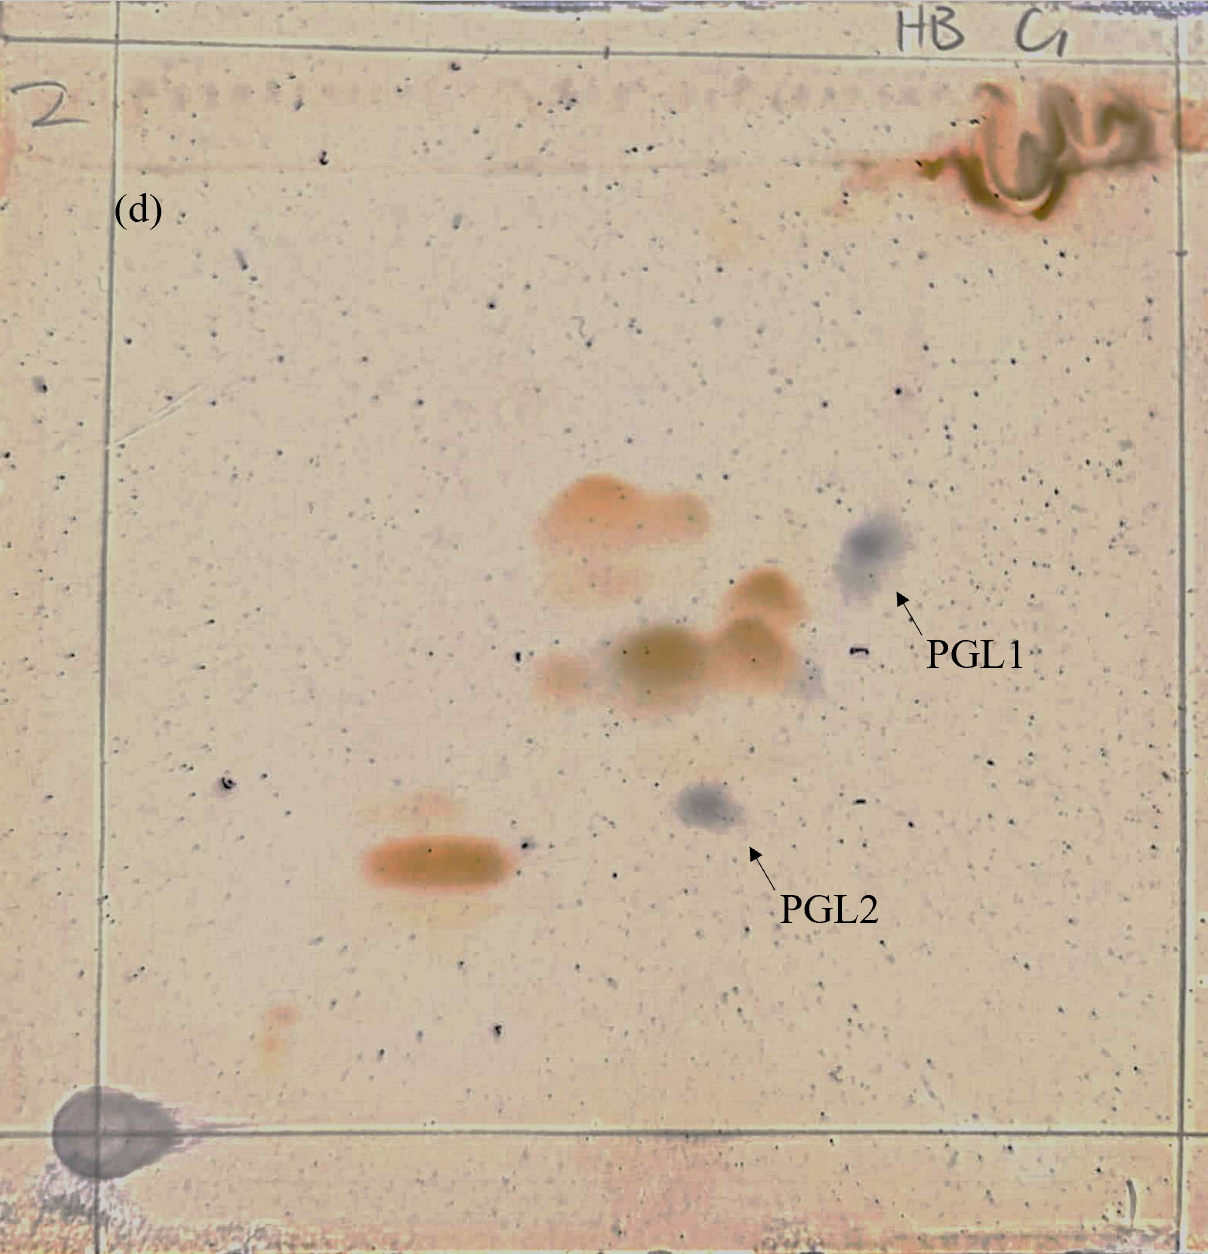


Fig. S3. Maximum-parsimony phylogenetic tree reconstructed based on the 16S rRNA gene

sequences of strain HB0163T and the related taxa. Bootstrap values based on 1000 replicates are listed as percentages at branching points and less than 50 % are not shown.


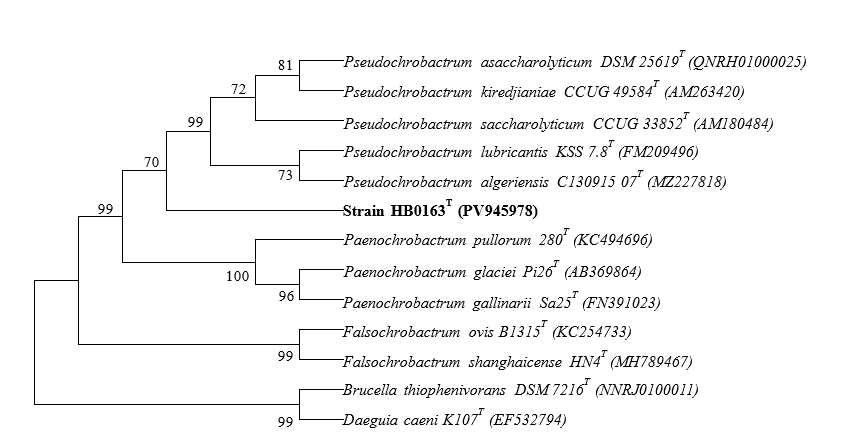


Fig. S4. Maximum-likelihood phylogenetic tree reconstructed based on the 16S rRNA gene

sequences of strain HB0163T and the related taxa. Bootstrap values based on 1000 replicates are listed as percentages at branching points and less than 50 % are not shown. Bar, 0.005 substitutions per nucleotide position.


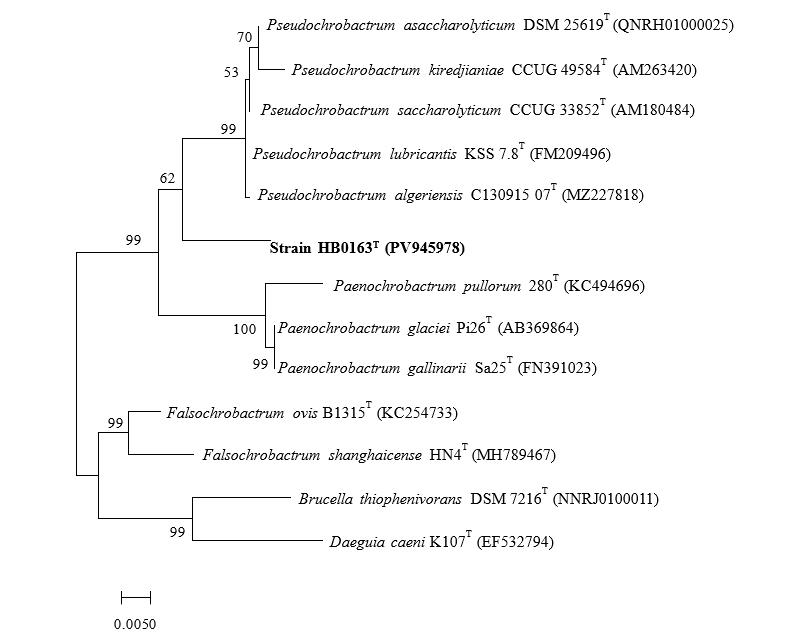

Supplement: Supplementary file 1 [file 37c35d94137fc6ea83ec24cd.docx]
